# Supplementary material
Source: Research Square preprint supplement (doi:10.21203/rs.3.rs-9557939/v1)
Supplement: Supplementary file 1 [file 16ea7c1f826a2f7db9f7f812.docx]

**Appendix C — Supplemental LCA Model Fit Tables**

Tables C1 and C2 present model fit and diagnostic criteria for the full-item and sparse indicator specifications, complementing the UTAUT2 results reported in the main text (Tables 2 and 3). Three-class solutions are indicated with an asterisk and bold formatting for all specifications.

**Table C1**

*Model Fit Criteria Across Class Solutions: Full-Item, Sparse, and UTAUT2 Specifications*

| **Speci-fication** | **Classes** | **LL** | **AIC** | **BIC** | **SABIC** | **BF** |
| --- | --- | --- | --- | --- | --- | --- |
|  | | | | | | |
| **Full-Item** | | | | | | |
|  | 1 | −2,803.15 | 5,730.29 | 5,909.96 | 5,713.84 | — |
|  | 2 | −2,340.68 | 4,931.35 | 5,293.58 | 4,898.18 | 6.99 × 10133 |
|  | **3*** | **−2,112.40** | **4,600.80** | **5,145.59** | **4,550.90** | **1.37 × 1032** |
|  | 4 | −2,037.89 | 4,577.78 | 5,305.13 | 4,511.16 | 2.27 × 10−35 |
|  | 5 | −1,985.73 | 4,599.46 | 5,509.38 | 4,516.13 | 4.44 × 10−45 |
| **Sparse** | | | | | | |
|  | 1 | −1,234.78 | 2,521.55 | 2,596.90 | 2,514.65 | — |
|  | 2 | −1,077.77 | 2,261.53 | 2,415.12 | 2,247.46 | 2.97 × 1039 |
|  | **3*** | **−1,007.64** | **2,175.29** | **2,407.11** | **2,154.05** | **5.46 × 101** |
|  | 4 | −976.97 | 2,167.95 | 2,478.02 | 2,139.55 | 4.01 × 10−16 |
|  | 5 | −956.13 | 2,180.25 | 2,568.56 | 2,144.69 | 2.18 × 10−20 |
| **UTAUT2** | | | | | | |
|  | 1 | −1,131.13 | 2,316.25 | 2,394.50 | 2,309.09 | — |
|  | 2 | −950.54 | 2,011.08 | 2,170.46 | 1,996.48 | 4.46 × 1048 |
|  | **3*** | **−854.02** | **1,874.03** | **2,114.55** | **1,852.01** | **1.38 × 1012** |
|  | 4 | −832.21 | 1,886.42 | 2,208.08 | 1,856.96 | 4.92 × 10−21 |
|  | 5 | −815.30 | 1,908.59 | 2,311.39 | 1,871.70 | 3.68 × 10−23 |

**Note.** LL = log-likelihood. AIC = Akaike Information Criterion (lower = better). BIC = Bayesian Information Criterion (lower = better); primary model selection criterion. SABIC = sample-size adjusted BIC. BF = BIC-approximated Bayes Factor comparing K vs. K − 1 class solutions; values > 10 indicate strong evidence for the larger model; values < 0.1 indicate evidence against. Full-item specification: 14 original indicators. Sparse specification: 12 indicators after removing highly correlated variables (**r** > .70) and collapsing rare response categories. UTAUT2 specification: 7 construct-level composites and single-item indicators. * Retained three-class solution.

**Table C2**

*Diagnostic Criteria Across Class Solutions: Full-Item, Sparse, and UTAUT2 Specifications*

| **Specification** | **Classes** | **Smallest *n*** | **Smallest %** | **Entropy** | **ALCPP** |
| --- | --- | --- | --- | --- | --- |
|  | | | | | |
| **Full-Item** | | | | | |
|  | 1 | 134 | 100.0 | — | — |
|  | 2 | 46 | 34.4 | 0.985 | 0.996 |
|  | **3*** | **33** | **24.8** | **0.997** | **0.997** |
|  | 4 | 20 | 14.5 | 0.984 | 0.993 |
|  | 5 | 15 | 10.9 | 0.987 | 0.993 |
| **Sparse** | | | | | |
|  | 1 | 134 | 100.0 | — | — |
|  | 2 | 49 | 36.8 | 0.971 | 0.992 |
|  | **3*** | **37** | **27.9** | **0.956** | **0.979** |
|  | 4 | 11 | 8.3 | 0.963 | 0.980 |
|  | 5 | 8 | 6.3 | 0.963 | 0.976 |
| **UTAUT2** | | | | | |
|  | 1 | 134 | 100.0 | — | — |
|  | 2 | 43 | 32.0 | 0.951 | 0.986 |
|  | **3*** | **27** | **20.1** | **0.982** | **0.978** |
|  | 4 | 15 | 11.5 | 0.952 | 0.972 |
|  | 5 | 13 | 9.5 | 0.956 | 0.971 |

**Note.** ALCPP = Average Latent Class Posterior Probability; values ≥ .90 are considered acceptable, values closer to 1.0 indicate near-certain modal class assignment. Entropy ranges from 0 to 1; values ≥ .80 indicate good class separation, values ≥ .90 indicate excellent separation. Dashes indicate that entropy and ALCPP are not applicable for single-class solutions. For the Sparse 4-class solution (**n** = 11, 8.3%) and 5-class solution (**n** = 8, 6.3%), smallest class sizes fall below the recommended minimum, supporting the three-class solution as optimal for that specification. * Retained three-class solution.
