# Supplementary material
Source: Research Square preprint supplement (doi:10.21203/rs.3.rs-9557939/v1)
Supplement: Supplementary file 2 [file c529fc97bf68c3e1547a212c.docx]

**Appendix A**

**Full Questionnaire: German Original and English Translation**

**Instrument Development and Rationale**

The survey instrument was developed through a systematic, iterative process designed to balance theoretical grounding with ecological validity in a long-term care context. An initial item pool was generated collaboratively by two nursing domain experts and three members of the research team, drawing on validated Unified Theory of Acceptance and Use of Technology (UTAUT2) measures (Venkatesh et al., 2012), qualitative interview findings on nurses’ perceptions of AI speech documentation (Ferizaj & Neumann, 2024), and results from a preceding time-motion study in the same care context (Schwabe et al., 2026). Items were evaluated by five expert reviewers using a binary keep/reject rating (0 = reject, 1 = keep): items unanimously endorsed (score = 5) were retained directly; items endorsed by four reviewers (score = 4) were retained following consensus discussion; items scoring below three were excluded. The resulting instrument was pretested under realistic shift conditions by two practicing nurses at one of the cooperating facilities, and no major modifications were required following pretesting.

The final instrument operationalised six of the seven UTAUT2 constructs and one additional construct relevant to this implementation context: trust in data security. Four UTAUT2 constructs were assessed with multiple items: Performance Expectancy (three items), Effort Expectancy (four items), Facilitating Conditions (two items), and Habit (two items). Two UTAUT2 constructs were assessed with single indicators: Hedonic Motivation and Social Influence. Trust in Data Security was assessed with one additional single item. The seventh UTAUT2 construct, Price Value, was not assessed because software costs were covered by the employerSociodemographic variables captured age group (six ordinal categories), professional role (seven categories), technology affinity (seven-point confidence scale), initial affective reaction to implementation (four-point scale), and duration of voize use prior to survey completion (four ordinal categories). Indicators for auxiliary validation included satisfaction, likelihood to recommend, time saved per shift, usage frequency, technology affinity, usage duration, age group, and the three binary implementation outcomes: intention to continue use, perceived improvement in documentation quality, and perceived improvement in handover quality. Table A1 presents all items in their English translation alongside the original German wording and the applicable response scales.

**Table A1**

Survey Items by Construct: English Translation and German Original

| **Construct** | **Item Code** | **English Item** | **German Item (Original)** | **Response Scale** |
| --- | --- | --- | --- | --- |
| **Performance Expectancy (PE)** | | | | |
| PE | work_relief_voize | I feel a reduction in my workload thanks to voize. | Ich spüre eine Entlastung durch voize. | 1–5 Likert |
| PE | documents_more_w_voize | With voize, I document things that I used to forget. | Mit voize dokumentiere ich Dinge, die ich früher vergessen habe. | 1–5 Likert |
| PE | more_time_residents | Thanks to voize, I have more time for the residents. | Durch voize habe ich mehr Zeit für die Bewohner:innen. | 1–5 Likert |
| **Effort Expectancy (EE)** | | | | |
| EE | easy_to_learn_voize | I found it easy to learn how to use voize. | Es ist mir leicht gefallen, den Umgang mit voize zu lernen. | 1–5 Likert |
| EE | ease_of_use_voize | I find that voize is easy to use. | Ich finde, dass voize einfach in der Anwendung ist. | 1–5 Likert |
| EE | reliable_speech_recognition | voize understands me well. | voize versteht mich gut. | 1–5 Likert |
| EE | system_reliability | I find that voize works reliably. | Ich finde, dass voize zuverlässig funktioniert. | 1–5 Likert |
| **Facilitating Conditions (FC)** | | | | |
| FC | quick_help_available | When I have questions, I get help quickly. | Bei Fragen bekomme ich schnell Hilfe. | 1–5 Likert |
| FC | enough_time_to_learn_voize | I had enough time to learn how to use voize. | Ich hatte genug Zeit, um die Anwendung von voize zu lernen. | 1–5 Likert |
| **Habit (HT)** | | | | |
| HT | habit_formation | I have gotten used to documenting with voize. | Ich habe mich daran gewöhnt mit voize zu dokumentieren. | 1–5 Likert |
| HT | independent_voize_use | I use voize even when my supervisors are absent. | Ich nutze voize auch in Abwesenheit meiner Vorgesetzten. | 1–5 Likert |
| **Hedonic Motivation (HM) [single item]** | | | | |
| HM | enjoyment_voize | I enjoy documenting with voize. | Dokumentieren mit voize macht mir Spaß. | 1–5 Likert |
| **Social Influence (SI) [single item]** | | | | |
| SI | team_likes_voize | My team supports me using voize. | Mein Team unterstützt es, dass ich voize nutze. | 1–5 Likert |
| **Trust in Data Security (TR) [single item]** | | | | |
| TR | trust_data_security | I trust that voize handles the documentation data securely. | Ich vertraue, dass voize sicher mit den Dokumentationsdaten umgeht. | 1–5 Likert |
| **Auxiliary Outcomes** | | | | |
| Satisfaction | satisfaction_voize | I am satisfied with voize. | Ich bin zufrieden mit voize! | 1–5 Likert |
| Intention to Continue | intention_to_use_continue | I want to continue using voize. | Ich möchte voize weiter nutzen! | Binary (0 = No; 1 = yes) |
| Improved Handover | improved_handover | Using voize has improved the handover between shifts. | Durch die Nutzung von voize hat sich die (Schicht-)Übergabe verbessert. | Binary (0 = No; 1 = yes) |
| Improved Quality | improved_quality | Using voize has improved my overall documentation quality. | Durch die Nutzung von voize hat sich meine Dokumentationsqualität insgesamt verbessert. | Binary (0 = No; 1 = yes) |
| Recommendation | recommendation_voize | How likely are you to recommend voize to fellow nurses/caregivers you know? | Wie wahrscheinlich ist es, dass du voize befreundeten Pflegekräften empfiehlst? | 0 (not at all likely) to 10 (extremely likely) |
| Time Saved | time_saved_per_shift | With voize, I can document faster and save per shift: | Mit voize kann ich schneller dokumentieren und spare in einer Schicht: | 1 = no time; 2 = 5–10 min; 3 = 10–20 min; 4 = 20–30 min; 5 = 30–45 min |
| Usage Frequency | usage_voize | Do you use voize? (Never / Rarely / Regularly / Very often / Always) | Nutzt du voize? (Nie / Selten / Regelmäßig / Sehr oft / Immer) | 1 (never) to 5 (always, every shift) |
| **Sociodemographic and Background Variables** | | | | |
| Age | age | How old are you? | Wie alt bist du? | 6 ordinal categories: <21 to >60 years |
| Professional Role | role | What is your role? (Qualified Nurse / Nursing Assistant / Care Assistant / Trainee / Head Nurse / Ward Manager / Other) | Du bist... (Pflegefachkraft / Pflegehilfskraft / Betreuungskraft / Auszubildende / Pflegedienstleitung / Wohnbereichsleitung / Sonstiges) | 7 categories |
| Technology Affinity | tech_affinity | How confident do you generally rate yourself in using technology? | Wie sicher schätzt du dich im Allgemeinen im Umgang mit Technik ein? | 1 (not at all) to 7 (very confident) |
| Initial Reaction | initial_reaction_voize | How did you feel when you found out that your facility would be using voize? | Wie hast du dich gefühlt, als du erfahren hast, dass ihr voize bekommt? | 1 (not happy at all) to 4 (very happy) |
| Usage Duration | voize_usage_duration | How long have you been using voize? | Wie lange nutzt du voize bereits? | 0–4 weeks / 5–8 weeks / 9–12 weeks / >12 weeks |

**Note.** PE = Performance Expectancy; EE = Effort Expectancy; FC = Facilitating Conditions; HT = Habit; HM = Hedonic Motivation; SI = Social Influence; TR = Trust in Data Security. Multi-item construct scores were computed as unweighted means of their constituent items. Items marked [single item] were not aggregated into composite scores. The item independent_voize_use was conceptually assigned to Habit based on theoretical reasoning and qualitative pilot findings; its potential overlap with Social Influence is acknowledged and its classification has no impact on the latent class analysis results. Price Value was not included because software costs were covered by the employer. Open-text items (what do you like / dislike about voize; what would you change; how has documentation changed) are not shown as they were not used in quantitative analyses.

**References for Appendix A**

Ferizaj, D., & Neumann, S. (2024). Assessing perceptions and experiences of an AI-driven speech assistant for nursing documentation: A qualitative study in German nursing homes. In M. Kurosu & A. Hashizume (Eds.), Human-Computer Interaction (pp. 17–34). Springer Nature Switzerland. https://doi.org/10.1007/978-3-031-60449-2_2

Schwabe, K., Ferizaj, D., Neumann, S., Strube-Lahmann, S., & Lahmann, N. (2026). Time savings through an AI speech assistant for nursing documentation: A pre-post time-motion study in German long-term care. Journal of Medical Internet Research. Advance online publication. https://doi.org/10.2196/86078

Venkatesh, V., Thong, J. Y. L., & Xu, X. (2012). Consumer acceptance and use of information technology: Extending the unified theory of acceptance and use of technology. MIS Quarterly, 36(1), 157–178. https://doi.org/10.2307/41410412
