# Supplementary material
Source: Research Square preprint supplement (doi:10.21203/rs.3.rs-9557939/v1)
Supplement: Supplementary file 3 [file e2b23518b446d7f3ab92fcfb.docx]

Running head: USER GROUPS OF SPEECH DOCUMENTATION

**Appendix B**

**Measurement Model: Confirmatory Factor Analysis of UTAUT2 Constructs**

**Overview**

Confirmatory factor analysis (CFA) was conducted to evaluate the measurement model underlying the four multi-item UTAUT2 constructs—Performance Expectancy (PE), Effort Expectancy (EE), Facilitating Conditions (FC), and Habit (HT)—prior to the latent class analysis. The analysis was performed using the lavaan package (0.6-21) in R. All cross-loadings were constrained to zero and residual covariances between indicators of different constructs were fixed to zero. Model fit was evaluated using the Comparative Fit Index (CFI), Tucker–Lewis Index (TLI), Root Mean Square Error of Approximation (RMSEA), and Standardised Root Mean Square Residual (SRMR) (Hu & Bentler, 1999). Convergent validity was assessed via average variance extracted (AVE; threshold ≥ .50; Fornell & Larcker, 1981), and internal consistency via Cronbach’s α and composite reliability (ω).

The overall model fit was good to acceptable with CFI = .955, TLI = .949, and SRMR = .047. The RMSEA of .084 was above the conventional strict cut-off of .06 and therefore suggested some residual misfit in the model specification. All standardised factor loadings were statistically significant (all ps < .001) and ranged from .709 to .913, indicating adequate to strong indicator–construct relationships across all four scales (Table B2). Composite reliability (ω) exceeded .72 for all constructs, and AVE exceeded the convergent validity threshold of .50 (Fornell & Larcker, 1981) for all constructs (Table B3), supporting the adequacy of the construct operationalisation for use in subsequent latent class analysis.

**Table B1**

Model Fit Indices for the Confirmatory Factor Analysis of UTAUT2 Constructs

| **Fit Measure** | **Value** | **Threshold** | **Interpretation** |
| --- | --- | --- | --- |
| Chi-square (χ²) | 90.771 | — | — |
| Degrees of freedom | 38 | — | — |
| p-value | < .001 | > .05 | Significant |
| CFI (Comparative Fit Index) | .955 | ≥ .90 | Good |
| TLI (Tucker–Lewis Index) | .949 | ≥ .90 | Acceptable |
| RMSEA (Root Mean Square Error of Approximation) | .084 | ≤ .06 | Above the strict threshold |
| SRMR (Standardised Root Mean Square Residual) | .047 | ≤ .08 | Excellent |

**Note.** CFI = Comparative Fit Index; TLI = Tucker–Lewis Index; RMSEA = Root Mean Square Error of Approximation; SRMR = Standardised Root Mean Square Residual (Hu & Bentler, 1999).

**Table B2**

Standardised Factor Loadings from the Confirmatory Factor Analysis

| **Construct** | **Indicator** | **Std. Loading** | **SE** | **z-value** | **p-value** |
| --- | --- | --- | --- | --- | --- |
| **Performance Expectancy (PE)** | | | | | |
| PE | Work relief from voize | .913 | .028 | 32.254 | < .001 |
| PE | Documents more with voize | .735 | .052 | 14.166 | < .001 |
| PE | More time for residents | .825 | .041 | 19.904 | < .001 |
| **Effort Expectancy (EE)** | | | | | |
| EE | Easy to learn voize | .776 | .055 | 14.229 | < .001 |
| EE | Ease of use voize | .732 | .096 | 7.621 | < .001 |
| EE | voize understands me well | .736 | .049 | 15.118 | < .001 |
| EE | voize works reliably | .726 | .048 | 15.033 | < .001 |
| **Facilitating Conditions (FC)** | | | | | |
| FC | Quick help available | .758 | .077 | 9.848 | < .001 |
| FC | Enough time to learn voize | .868 | .047 | 18.516 | < .001 |
| **Habit (HT)** | | | | | |
| HT | Habit (gotten used to documenting) | .798 | .062 | 12.916 | < .001 |
| HT | Independent voize use | .709 | .085 | 8.319 | < .001 |

**Note.** SE = standard error. All loadings are significant at p < .001 (two-tailed z-test). Loadings were estimated using the robust maximum likelihood estimator (MLR). PE = Performance Expectancy; EE = Effort Expectancy; FC = Facilitating Conditions; HT = Habit.

**Table B3**

Internal Consistency and Convergent Validity of UTAUT2 Constructs

| **Construct** | **Items (n)** | **Cronbach's α** | **CR (ω)** | **AVE** |
| --- | --- | --- | --- | --- |
| Performance Expectancy (PE) | 3 | .864 | .866 | .685 |
| Effort Expectancy (EE) | 4 | .831 | .831 | .552 |
| Facilitating Conditions (FC) | 2 | .796 | .797 | .664 |
| Habit (HT) | 2 | .725 | .726 | .570 |

**Note.** CR = composite reliability (ω); AVE = average variance extracted. Cronbach’s α and CR ≥ .70 indicate acceptable internal consistency. AVE ≥ .50 indicates acceptable convergent validity (Fornell & Larcker, 1981; https://doi.org/10.2307/3151312). Single-item constructs (Hedonic Motivation, Social Influence, Trust in Data Security) are not included as reliability and AVE are not applicable.

**References for Appendix B**

Fornell, C., & Larcker, D. F. (1981). Evaluating structural equation models with unobservable variables and measurement error. Journal of Marketing Research, 18(1), 39–50. https://doi.org/10.2307/3151312

Hu, L., & Bentler, P. M. (1999). Cutoff criteria for fit indexes in covariance structure analysis: Conventional criteria versus new alternatives. Structural Equation Modeling, 6(1), 1–55. https://doi.org/10.1080/10705519909540118
